# Supplementary material for: Mass spectrometric measurement of neuropeptide secretion in the crab, Cancer borealis, by in vivo microdialysis
Source: Royal Society of Chemistry journal article supplement (doi:10.1039/c4an02016b), 2014-12-12
Supplement: c4an02016b1.pdf [file c4an02016b1.pdf]

## Supporting Information

### **Mass Spectrometric Measurement of Neuropeptide Secretion in the Crab, *Cancer borealis*, by *In Vivo* Microdialysis**

Zhidan Liang,<sup>a</sup> Claire M. Schmerberg<sup>a, #</sup> and Lingjun Li<sup>abc, \*</sup>

<sup>a</sup> *School of Pharmacy, University of Wisconsin-Madison, 777 Highland Avenue, Madison, WI 53705, USA.*

<sup>b</sup> *Department of Chemistry, University of Wisconsin-Madison, 1101 University Avenue, Madison, WI 53706, USA*

<sup>c</sup> *Neuroscience Training Program, University of Wisconsin-Madison, 1111 Highland Ave. Madison, WI 53705, USA.*

<sup>#</sup> *Current address: Translational Neuroscience, Psychiatry Department, Duke University Medical Center, 303 Research Drive, Durham, NC 27710, USA*

<sup>\*</sup> *Author for correspondence. Email: lingjun.li@wisc.edu; Fax: +1(608) 262-5345; Tel: +1(608) 265-8491*

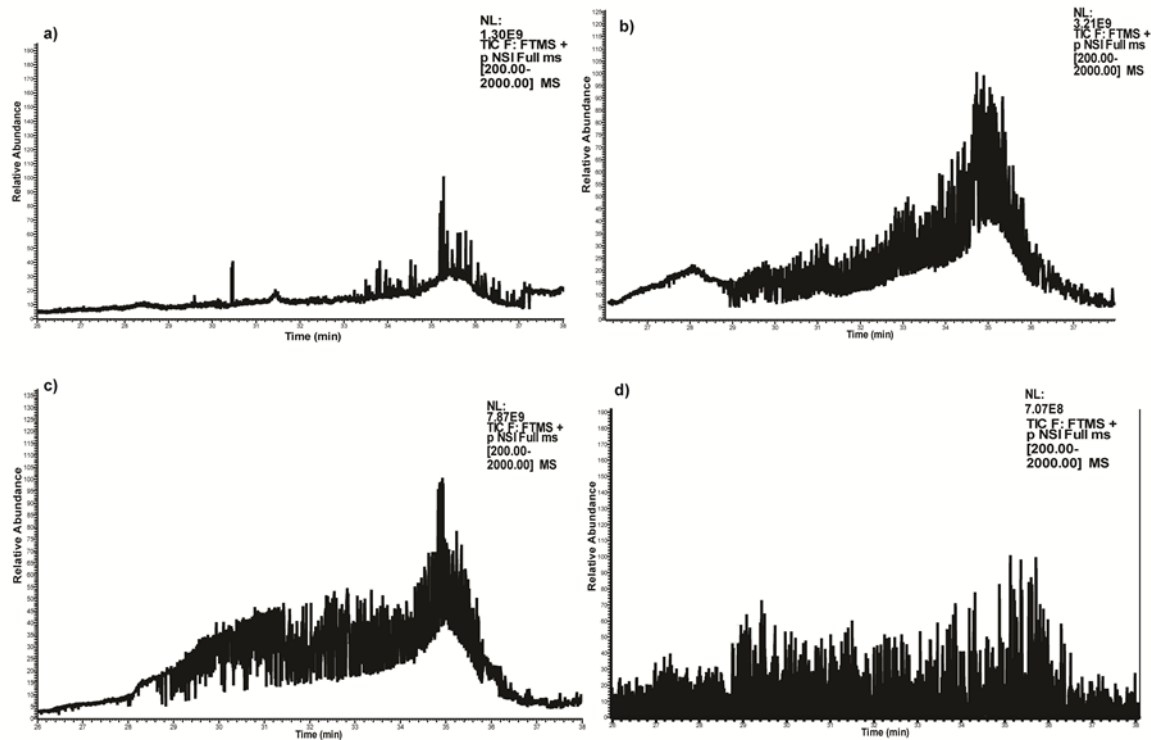

Figure S1. Total ion chromatograms of 2 h, 4 h, 6 h and 8 h dialysates upon LC-MS/MS analysis within retention time period between 26 min to 38 min where most peptides eluted, y-axis is the relative intensity and x-axis is the retention time. **a)** 2 h dialysate; **b)** 4 h dialysate; **c)** 6 h dialysate; **d)** 8 h dialysate. As the collection time gets longer, the overall intensity increases during 2-6 h collection period. The overall intensity drops as the collection time was extended to 8 h due to higher concentration of salts and other interfering compounds.
